# Supplementary material for: Skin and Blood Microbial Signatures of Sedentary and Migratory Trout (Salmo trutta) of the Kerguelen Islands
Source: MDPI journal article supplement (doi:10.3390/fishes8040174), 2023-03-24
Supplement: s1 [file s1]

# **Supplementary Materials: Skin and blood microbial signatures of sedentary and migratory trout (*Salmo trutta*) of Kerguelen Islands**

**Sophia Ferchiou<sup>1</sup>†, France Caza<sup>1</sup>†, Richard Villemur<sup>1</sup>, Jacques Labonne<sup>2</sup> and Yves St-Pierre<sup>1\*</sup>**

† These authors share first authorship.

<sup>1</sup> INRS-Centre Armand-Frappier Santé Biotechnologie, Laval, QC, Canada

<sup>2</sup> Université de Pau et des pays de l'Ardour, UMR ONRAE-UPPA, ECOBIOP Saint-Pée-sur-Nivelle, France

\* Correspondence: Yves St-Pierre ; E- mail: yves.st-pierre@inrs.ca; INRS-Centre Armand-Frappier Santé Technologie, 531 Boul. des Prairies, Laval, Québec, Canada, H7V 1B7 ; Phone: 450-686-5354; Fax: 450-686-5501.

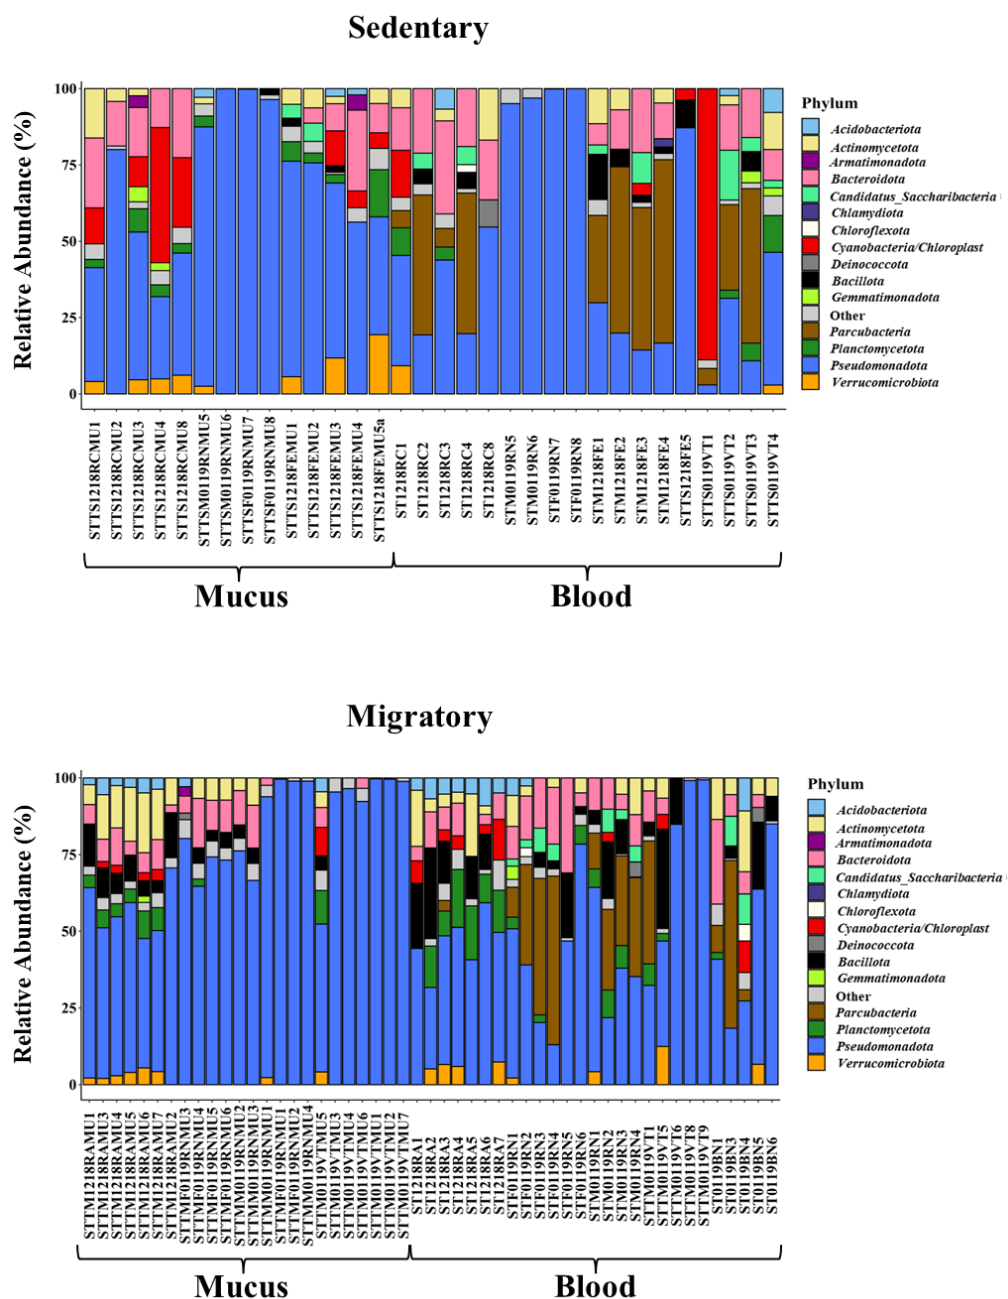

**Figure. S1: Individual variations in the circulating and mucosal microbiomes at the phylum level.** Bar plots display the main phyla between sedentary and migratory brown trout (*S. trutta*) for mucosal (left) and circulating (right) microbiomes. Phyla with a relative abundance of  $\leq 1.5\%$  are represented as "Other."

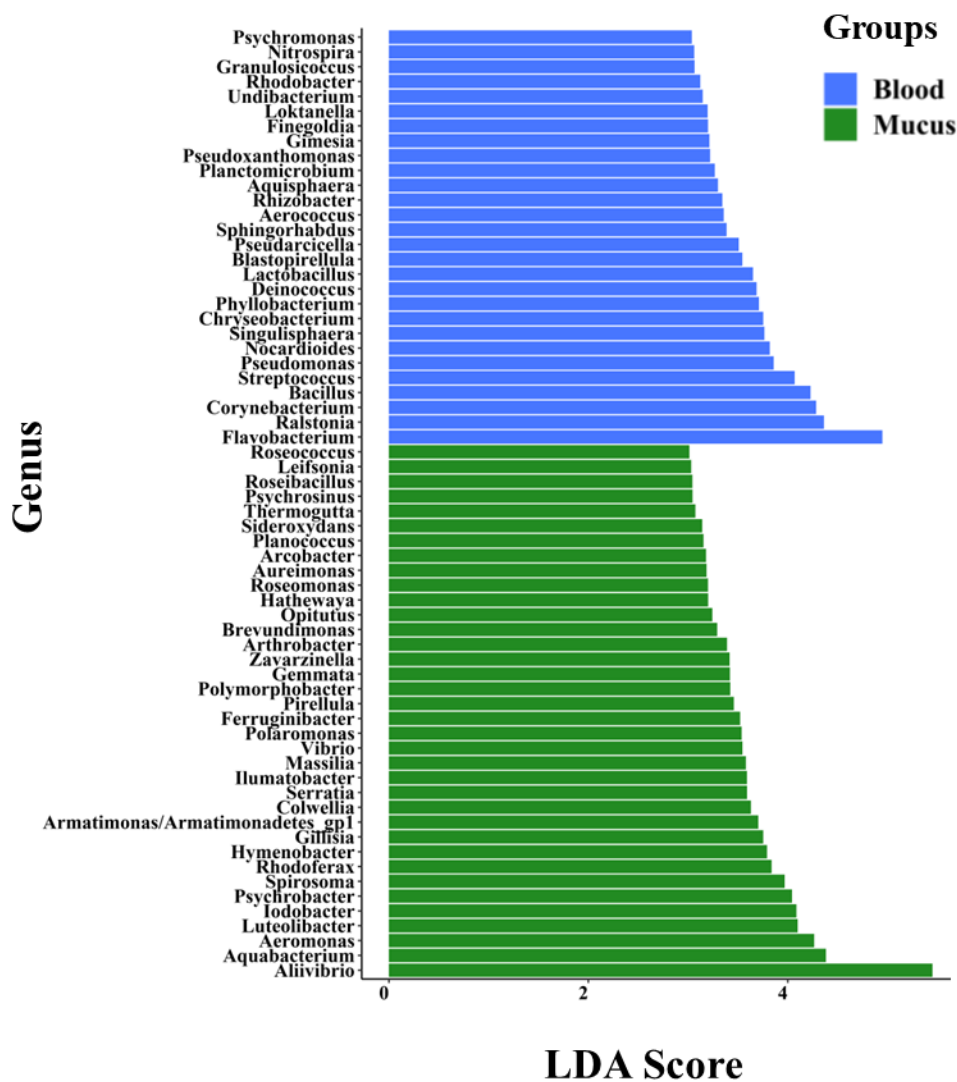

**Figure. S2: Discriminant genera between the circulating and mucosal compartments.** LEfSe analysis (log-transformed LDA > 3) showing the top genus-level biomarkers that distinguished both compartments in brown trout (*S. trutta*).

**A**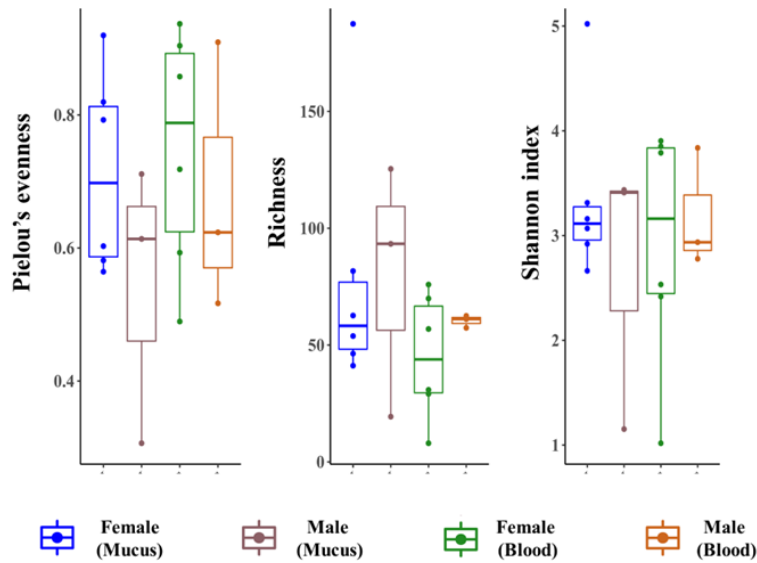**B**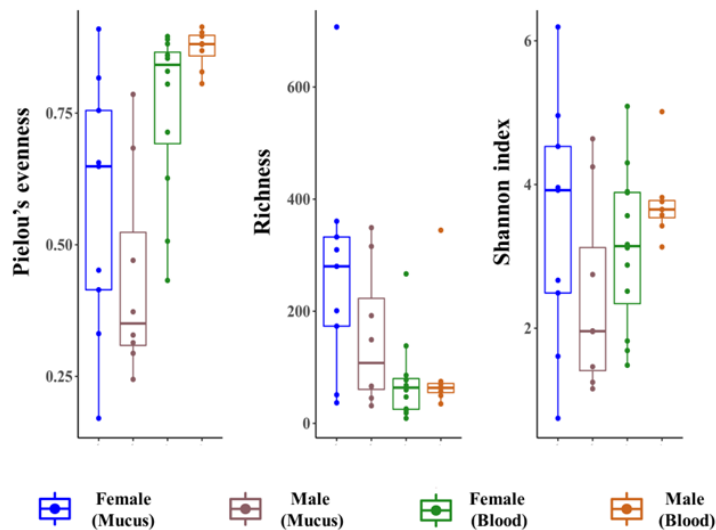

**Figure. S3: Alpha diversity analysis of mucosal and circulating microbiomes in (A) sedentary and (B) migratory brown trout (*S. trutta*).** Species evenness, observed richness and Shannon diversity indexes were calculated for both female and male samples. No significant differences were observed between specimens for the same compartment.

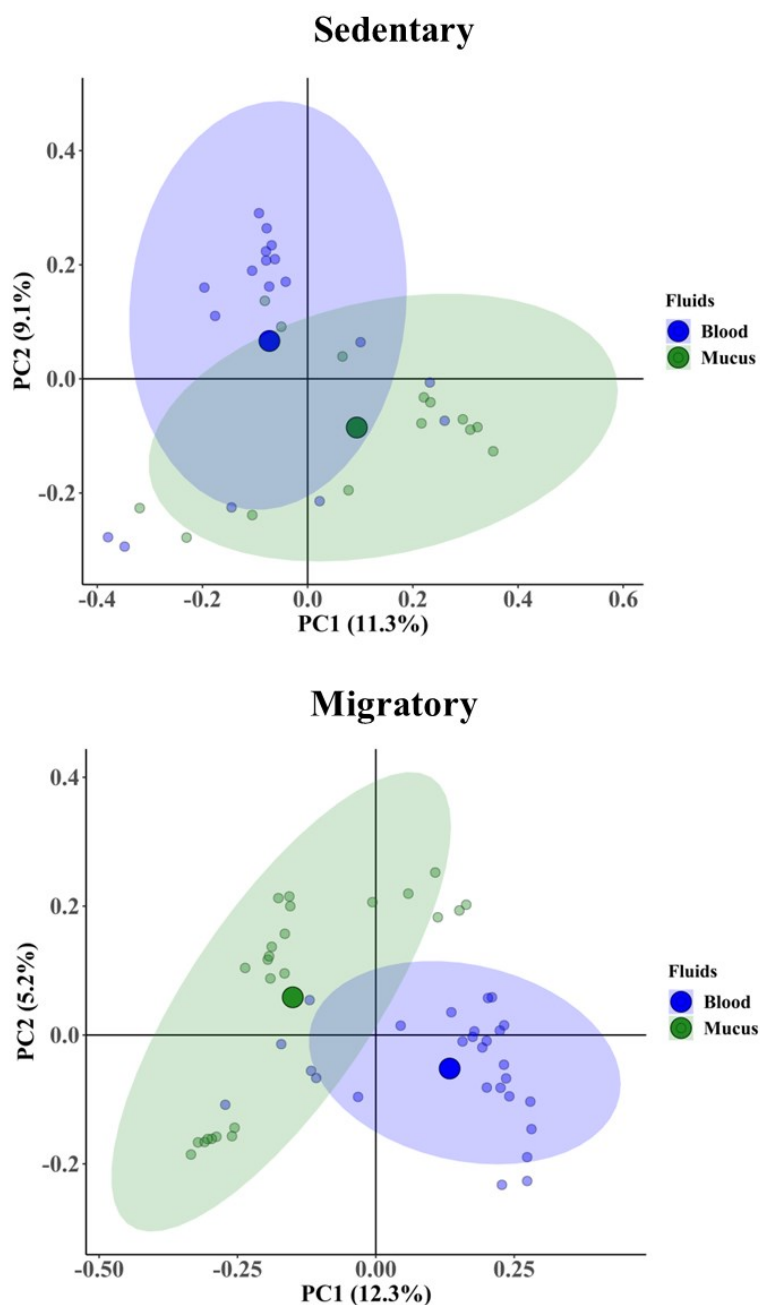

**Figure. S4: Principal Coordinates Analysis (PCoA) of bacterial DNA bacterial communities in both sedentary and migratory brown trout (*S. trutta*).** Unweighted UniFrac-based of blood (blue) and mucosa (red) samples. Centroids for each site are illustrated by larger circles. Ellipses represent 95% confidence interval.

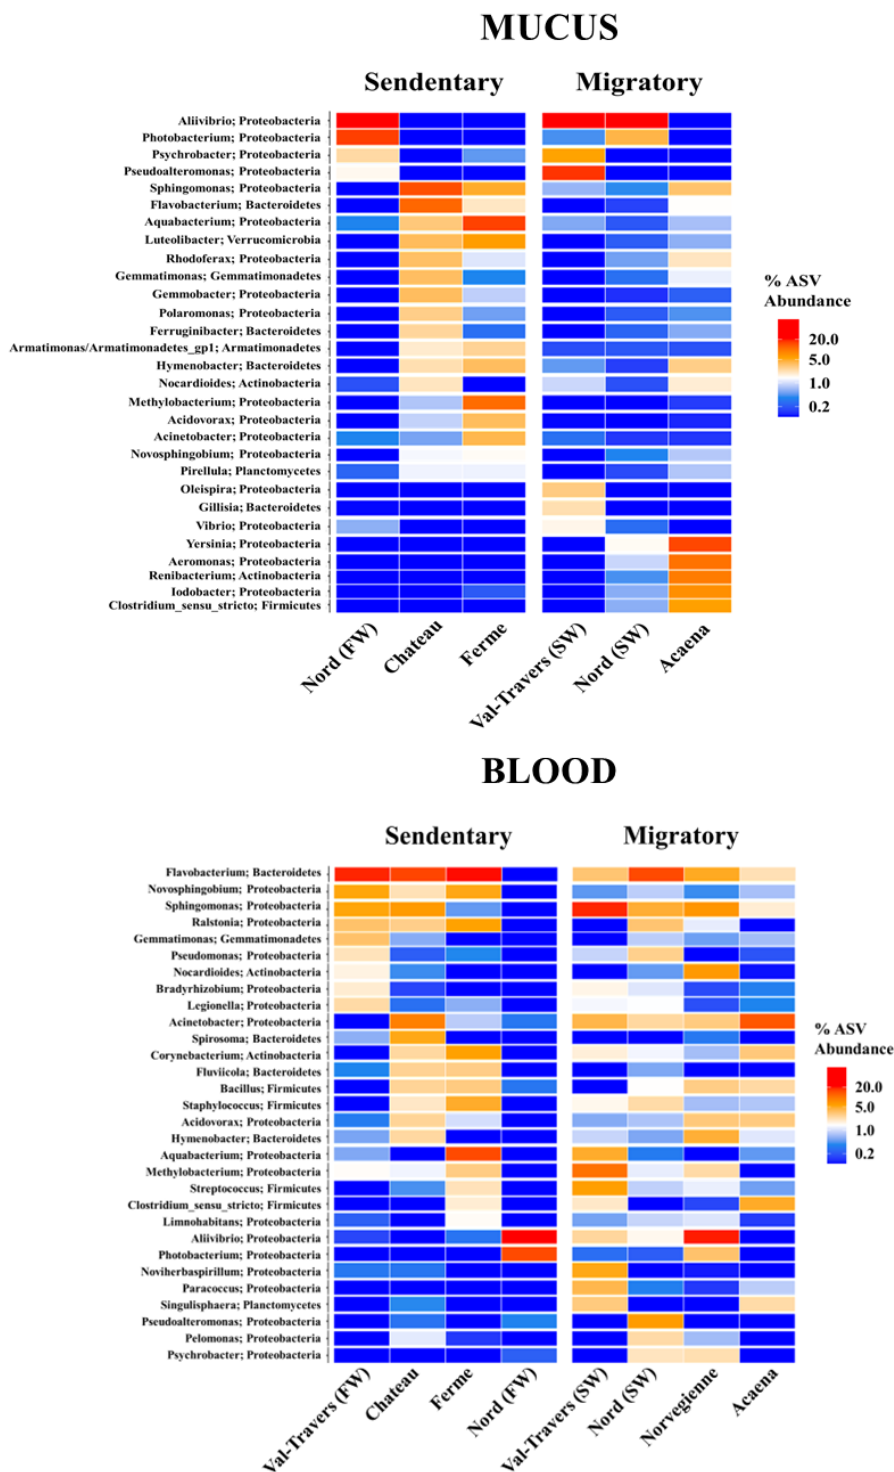

**Figure. S5:** Heatmaps showing relative abundance (%) of the top 30 bacterial genera of mucosal and circulating microbiomes between sedentary and migratory brown trout (*S. trutta*). Red colors indicate higher abundance and blue colors indicate lower abundances.

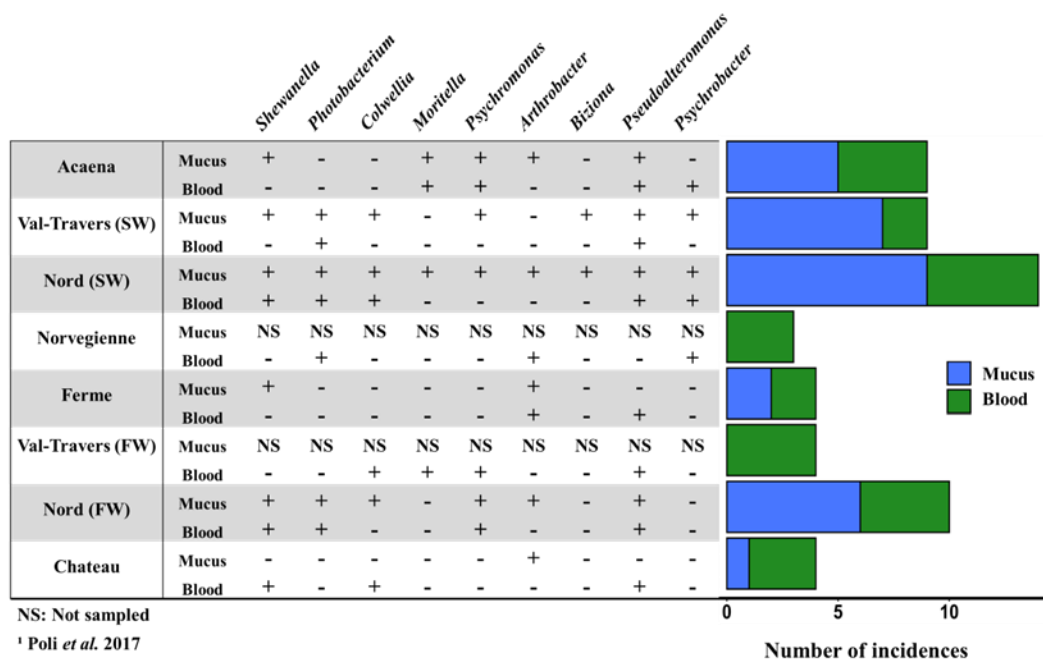

**Figure. S6: Presence of psychrophilic bacterial genera isolated from Kerguelen sites and compared to Poli *et al.* (2017) identification of psychrophilic bacteria.**

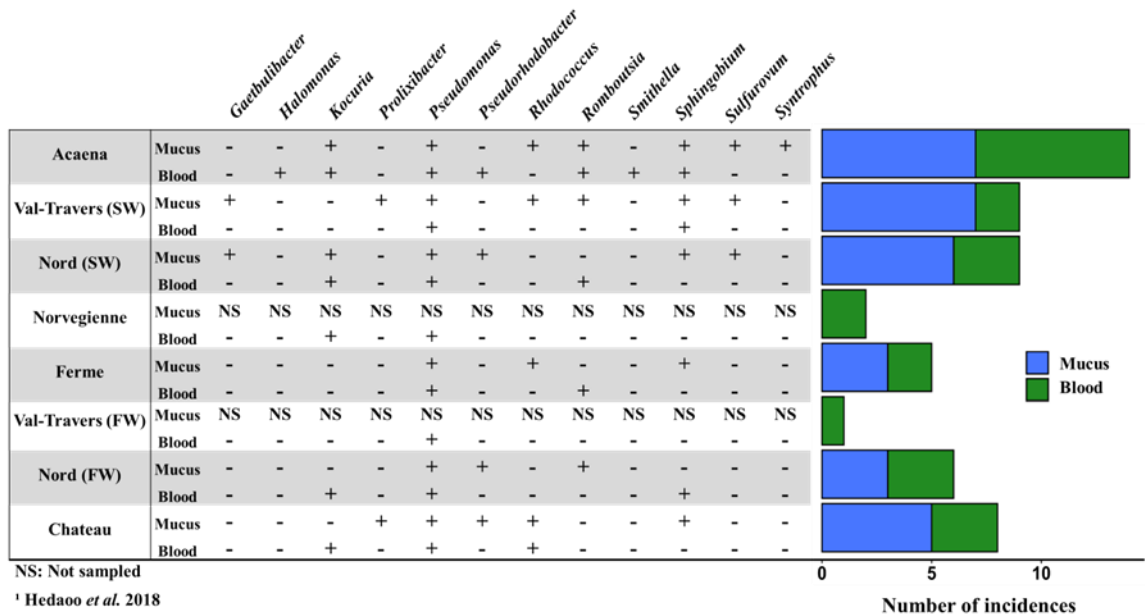

**Figure. S7: Presence of Kerguelen bacterial genera commonly associated to oil spills (cited more than four times in different scientific papers) based on Hedao *et al.* (2018).**



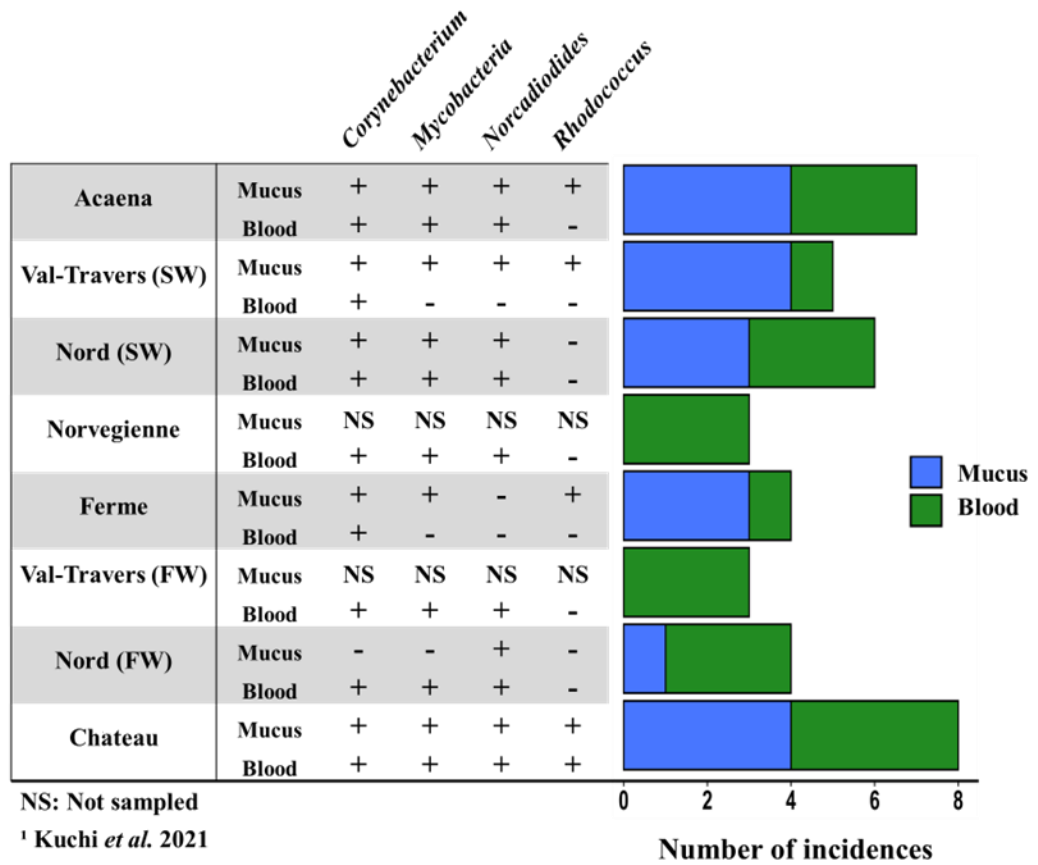

Figure. S8: Presence of Kerguelen bacterial genera known to degrade alkanes, phenols and phenanthrene which can be used as biomarkers for PAHs detection, based on Kuchi *et al.* (2021).

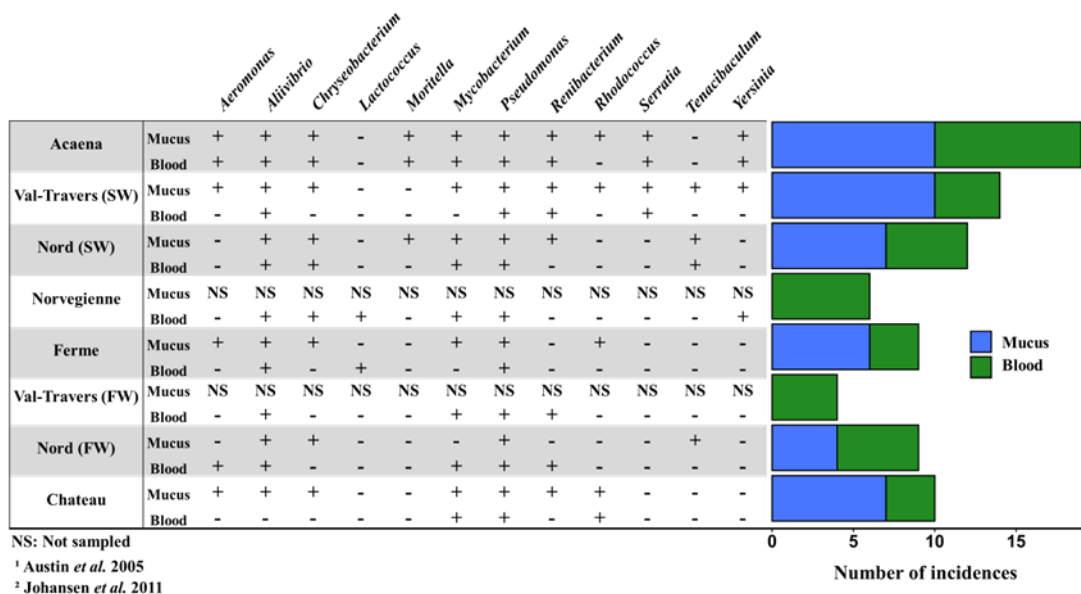

**Figure. S9: Presence of potentially pathogenic bacterial genera found at different sites in Kerguelen.**

**A**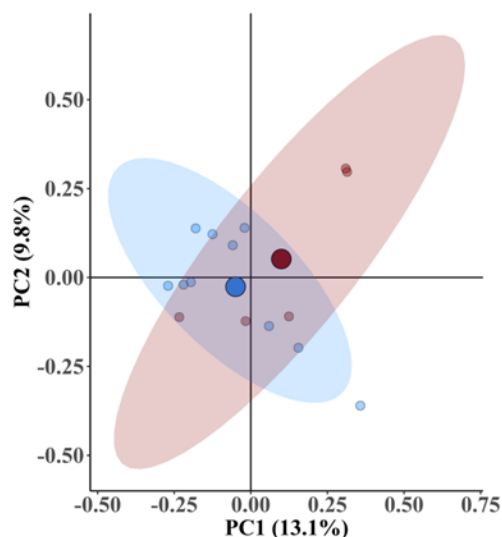**B**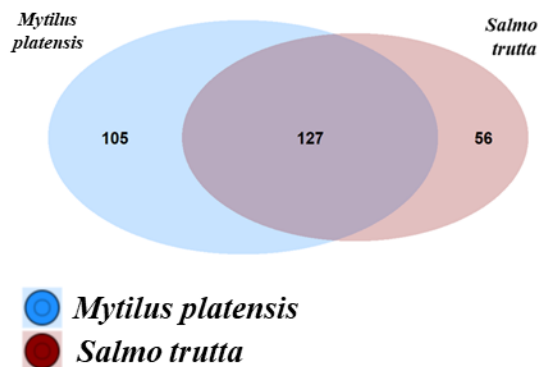

**Figure. S10: Bacterial cmDNA profiles in blue mussels (*Mytilus platensis*) and brown trout (*S. trutta*) collected at the mouth of the Norvegienne river. (A) Principal Coordinates Analysis (PCoA) of bacterial DNA bacterial communities in both species. Unweighted UniFrac-based of blue mussels (blue) and brown trout (red) samples. Centroids for each site are illustrated by larger circles. Ellipses represent 95% confidence interval. (C) A Venn diagram showing the number of unique and shared bacterial genera in blue mussels (blue) and brown trout (red) samples.**

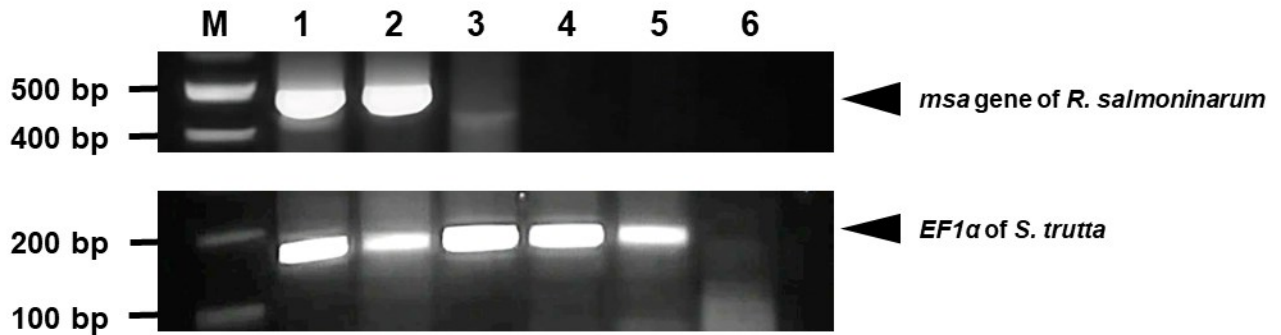

**Figure. S11: Amplified fragments shown on 1.5% agarose gel electrophoresis. A.** Amplicons generated from the *msa* gene of *R. salmoninarum* in positive mucosal and blood samples from Acaena river according to the protocol by Brown *et al.*(1994). No amplification occurred in samples from Baie Norvegienne river. The primer sequences are 5'-CAAGGTGAAGGGAATTCTTCCACT-3' and 5'-GACGGCAATGTCCGTTCCCGGTTT-3' for the forward and the reverse primers, respectively. **B.** Amplicons generated from the *EF1α* gene of *S. trutta* samples. The primer sequences are 5'-ATTGCCACACTGCTCACATC-3' and 5'-CTGGAAGCTCTCCACACACA-3' for the forward and the reverse primers, respectively. M: 100-base-pair DNA ladder; lanes 1–2: mucosal samples from Acaena river; lane 3: blood sample from Acaena river; lanes 4–5: blood samples from Baie Norvégienne river; lane 6: no DNA template.

**Table S1. Characteristics of brown trout (*S. trutta*) collected at different sites at Kerguelen Islands.**

| Phenotype | Site        | Compartment   | <i>n</i> | Average weight (kg)<br>± SE |
|-----------|-------------|---------------|----------|-----------------------------|
| Sedentary | Chateau     | Mucosal/Blood | 5/5      | 0.9 ± 0.1                   |
| Sedentary | Nord        | Mucosal/Blood | 4/4      | 2.7 ± 0.4                   |
| Sedentary | Ferme       | Mucosal/Blood | 5/5      | 0.3 ± 0.06                  |
| Sedentary | Val-Travers | Blood         | 4        | 0.08 ± 0.01                 |
| Migratory | Acaena      | Mucosal/Blood | 7/7      | 1.7 ± 0.4                   |
| Migratory | Nord        | Mucosal/Blood | 10/10    | 2.2 ± 0.3                   |
| Migratory | Val-Travers | Mucosal/Blood | 7/7      | 1.8 ± 0.2                   |
| Migratory | Norvegienne | Blood         | 5        | 3.2 ± 0.4                   |
